# Supplementary material for: Personalized prediction of UTI risk and antibiotic susceptibility based on gut E. coli.
Source: Research Square preprint supplement (doi:10.21203/rs.3.rs-8159345/v1), 2026-01-16
Supplement: Supplementary file 1 [file 988f9fc0cc5274c96c211749.pdf]

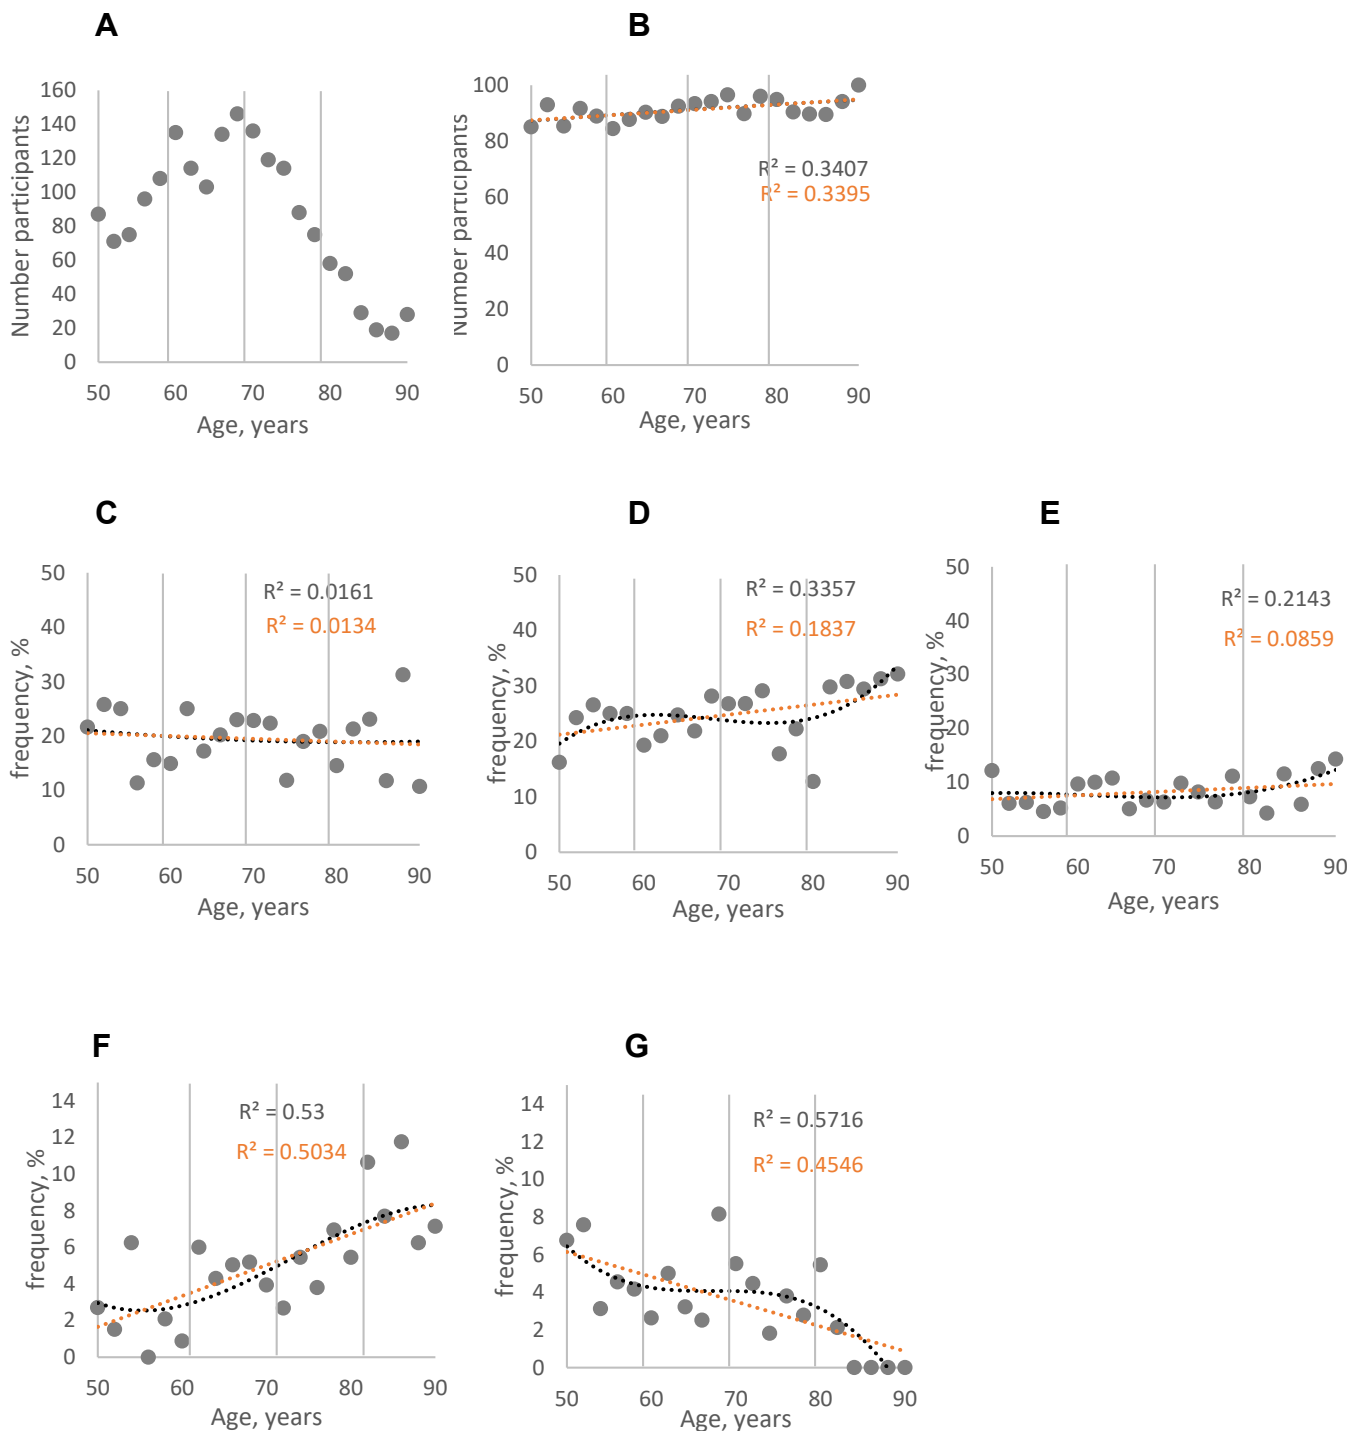

**Figure S1. Analysis of gut *E. coli* carriage and UTI incidence by age.** Number of participants, carriage rates and UTI incidence rates were aggregated for every two-year age bracket, and the frequency was calculated as a percentage of the total number of participants within each two-year age range. For participants 90-98 years of age numbers were aggregated into one bin. Plotted frequencies were used to calculate either the best-fit trend (grey dotted line), or linear trend (orange line), with  $R^2$  value shown on the graph in grey and orange, respectively. (A) Overall age distribution among study participants. (B) Prevalence of fecal samples with *E. coli*. (C) Prevalence of fecal samples with *E. coli* resistant to CIP. (D) Prevalence of fecal samples with *E. coli* resistant to TS. (E) Prevalence of fecal samples with *E. coli* resistant to 3GC. (F) Prevalence of fecal samples with *E. coli* from ST131-H30. (G) Prevalence of fecal samples with *E. coli* from ST1193.

**H**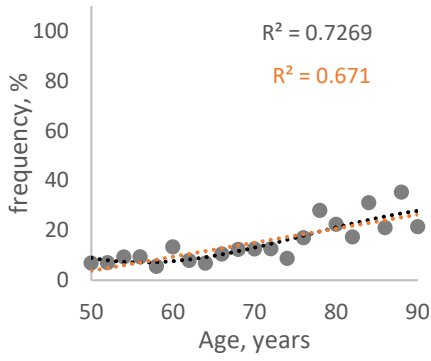**I**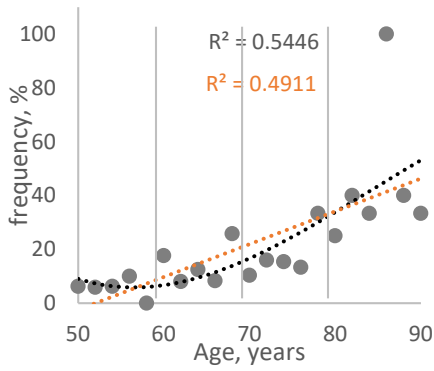**J**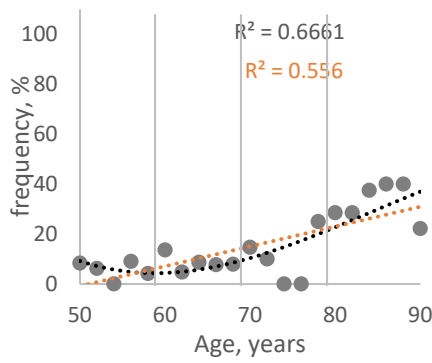**K**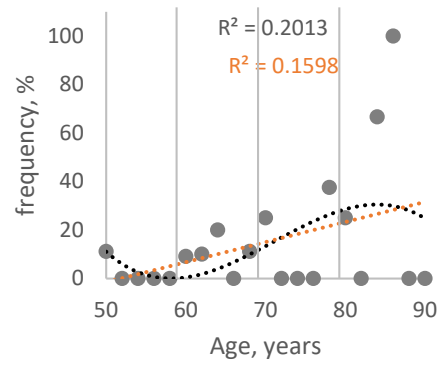**L**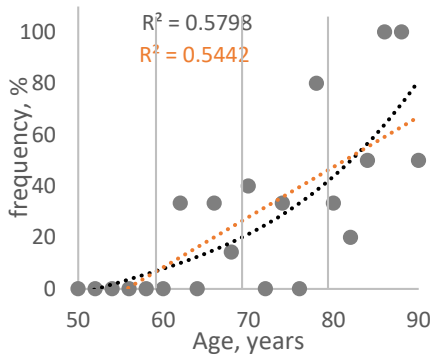**M**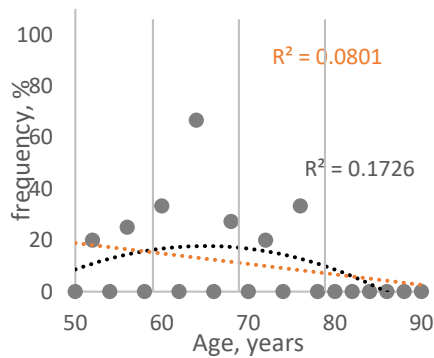

**Supplemental Figure S1. Analysis of gut *E. coli* carriage and UTI incidence by age<sup>22</sup> (continued).** (H) Overall UTI incidence rate distribution by age. UTI incidence rates in resistant *E. coli* carriers: FQREC carriers (I), TSREC carriers (J), 3GCREC carriers (K), H30 carriers (L) and ST1193 carriers (M).

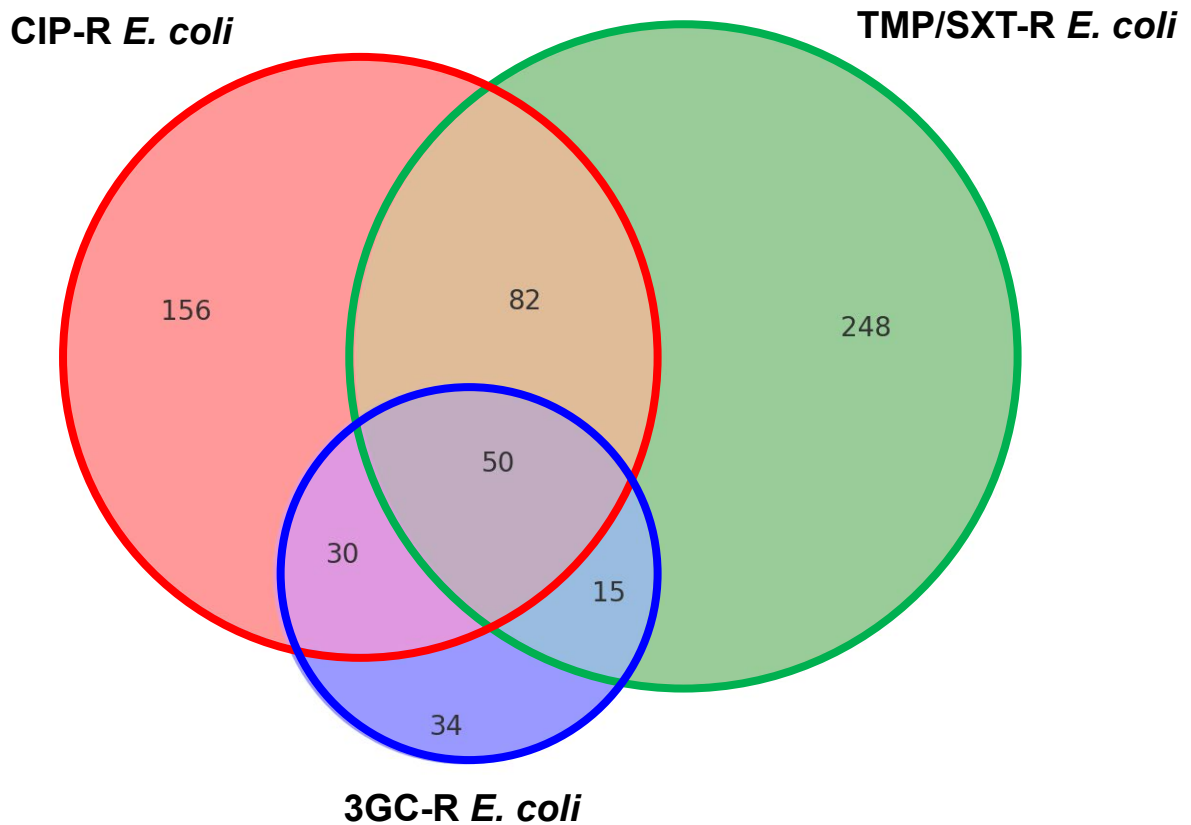

**Figure S2. Venn diagram showing the distribution of CIP-R, TMP/STX-R, and 3GC-R *E. coli* in fecal samples.** Overlaps indicate the presence of *E. coli* resistant to multiple antibiotics within the same fecal sample, regardless of whether the resistances are carried by the same or different clones.

**A**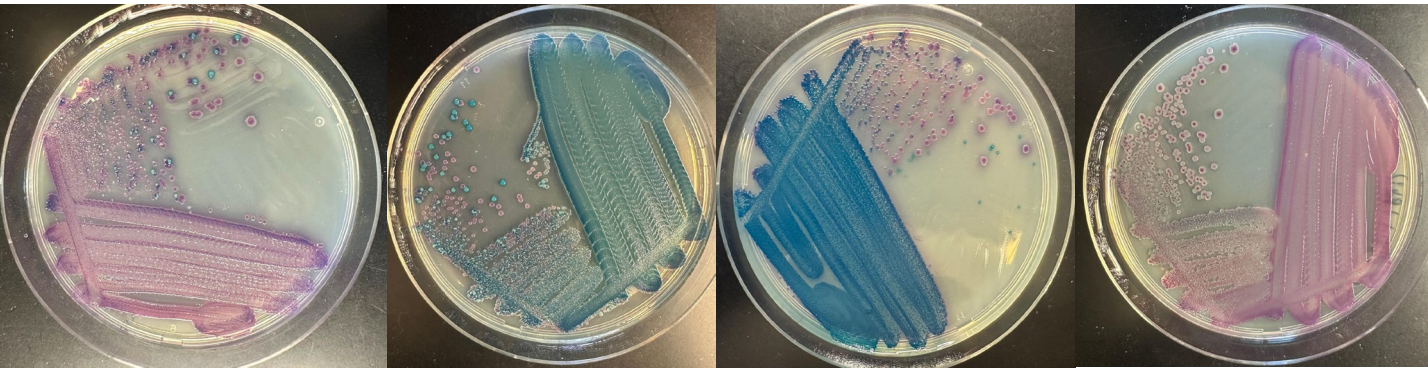**B**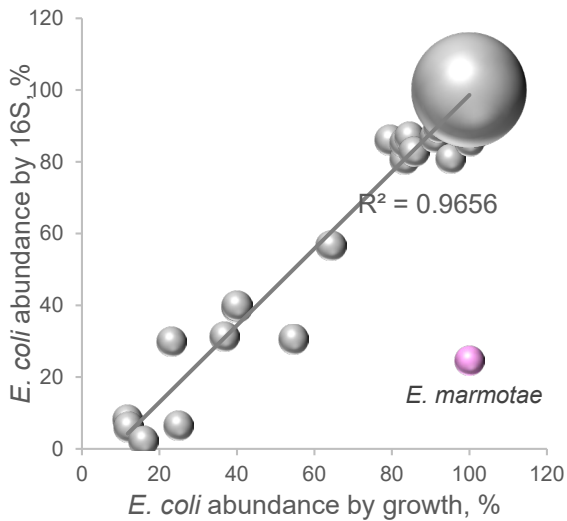**C**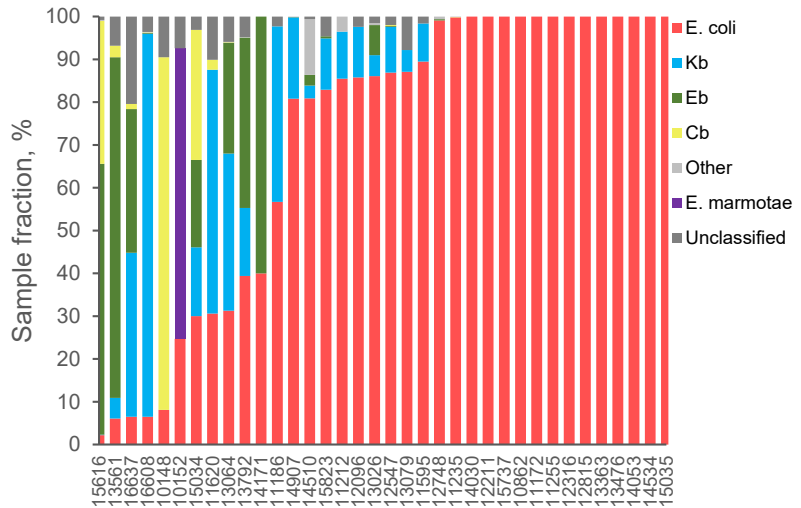

**Supplemental Figure S3. Comparative analysis of relative abundance of *E. coli* in fecal sample versus other bacteria.** (A) Various patterns of relative species abundance based on the four-quadrant streaking of the fecal samples on UTI agar. *E. coli* produce pink colonies. (B) Correlation between *E. coli* abundance in fecal samples estimated by growth on chromogenic UTI agar and determined by 16S sequencing. The size of a bubble reflects the number of samples. A linear trendline was plotted for all samples except one marked in color (*E. marmotae*), with  $R^2$  value indicated on the graph. (C) Relative abundance of *E. coli* and other bacterial species in fecal samples by 16S. The X-axis represents individual fecal samples, while the Y-axis shows the relative abundance of bacterial species as a percentage of the total bacterial composition in each sample.

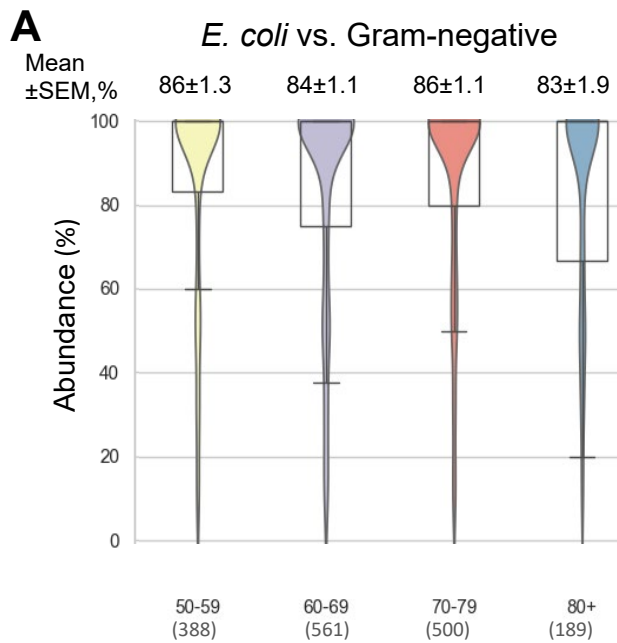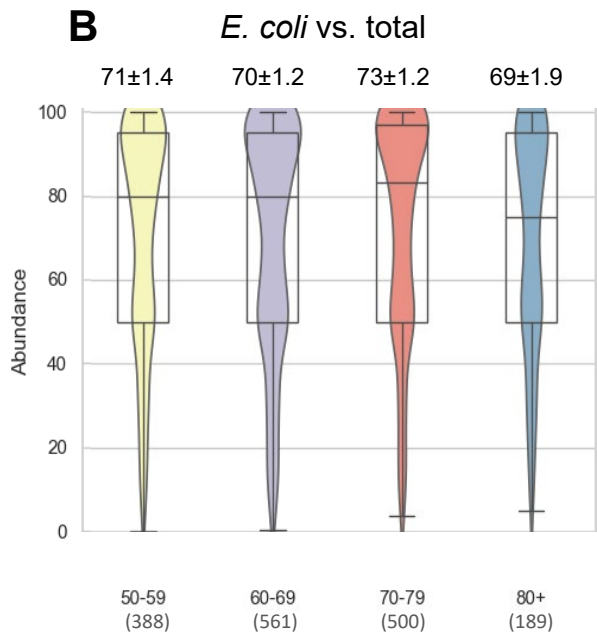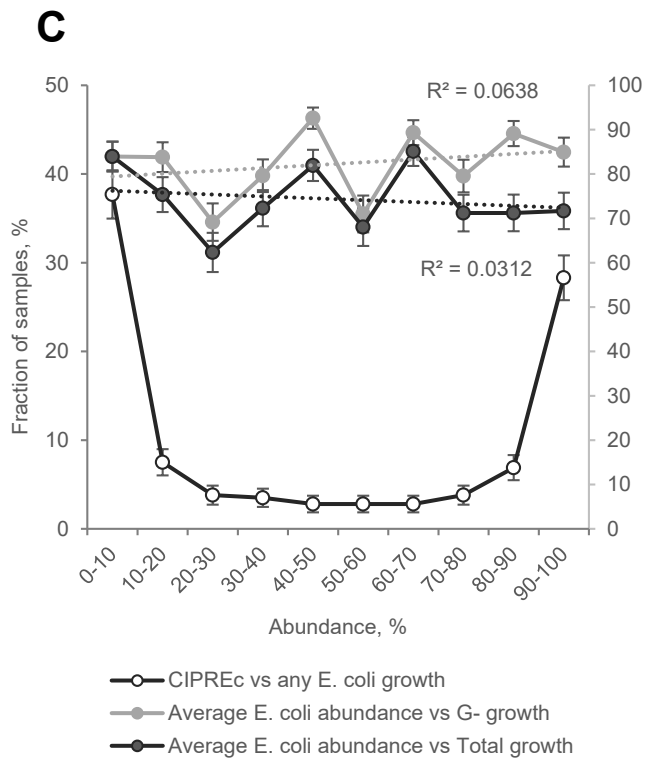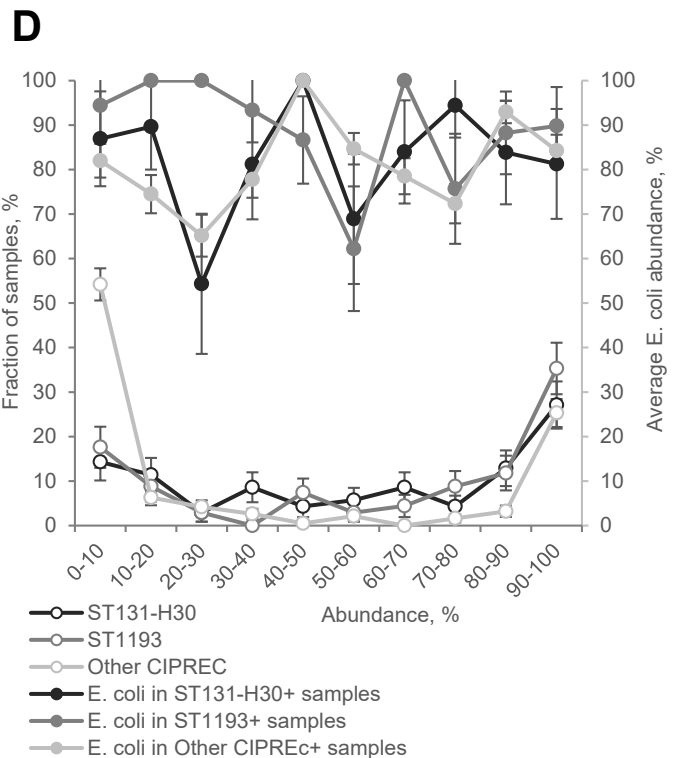

**Supplemental Figure S4. Distribution of different *E. coli* abundancies in fecal samples.** (A-B) Combined violin/box plot distribution of *E. coli* abundancies in fecal sample relatively to Gram-negative (A) or total (B) bacterial grown on UTI agar, split by the different age groups. Sample sizes for each age group are shown in parentheses. Mean abundancies (Mean  $\pm$  SEM %) are displayed above the plots, with no significant difference between the groups. (C-D) Distribution of CIP-R *E. coli* abundance compared to average *E. coli* abundance. (C) All CIP-R growth level relative to any *E. coli* growth is plotted on primary vertical axis, whereas average *E. coli* growth relative to Gram-negative (G-) or overall (Total) bacterial growth in these subsets of samples is plotted on a secondary vertical axis, with trendlines and  $R^2$  values representing linear fit of the data. Error bars represent standard error. (D) Same as (C) for different CIPREc clonal groups, with average *E. coli* growth relative to Gram-negative growth only.

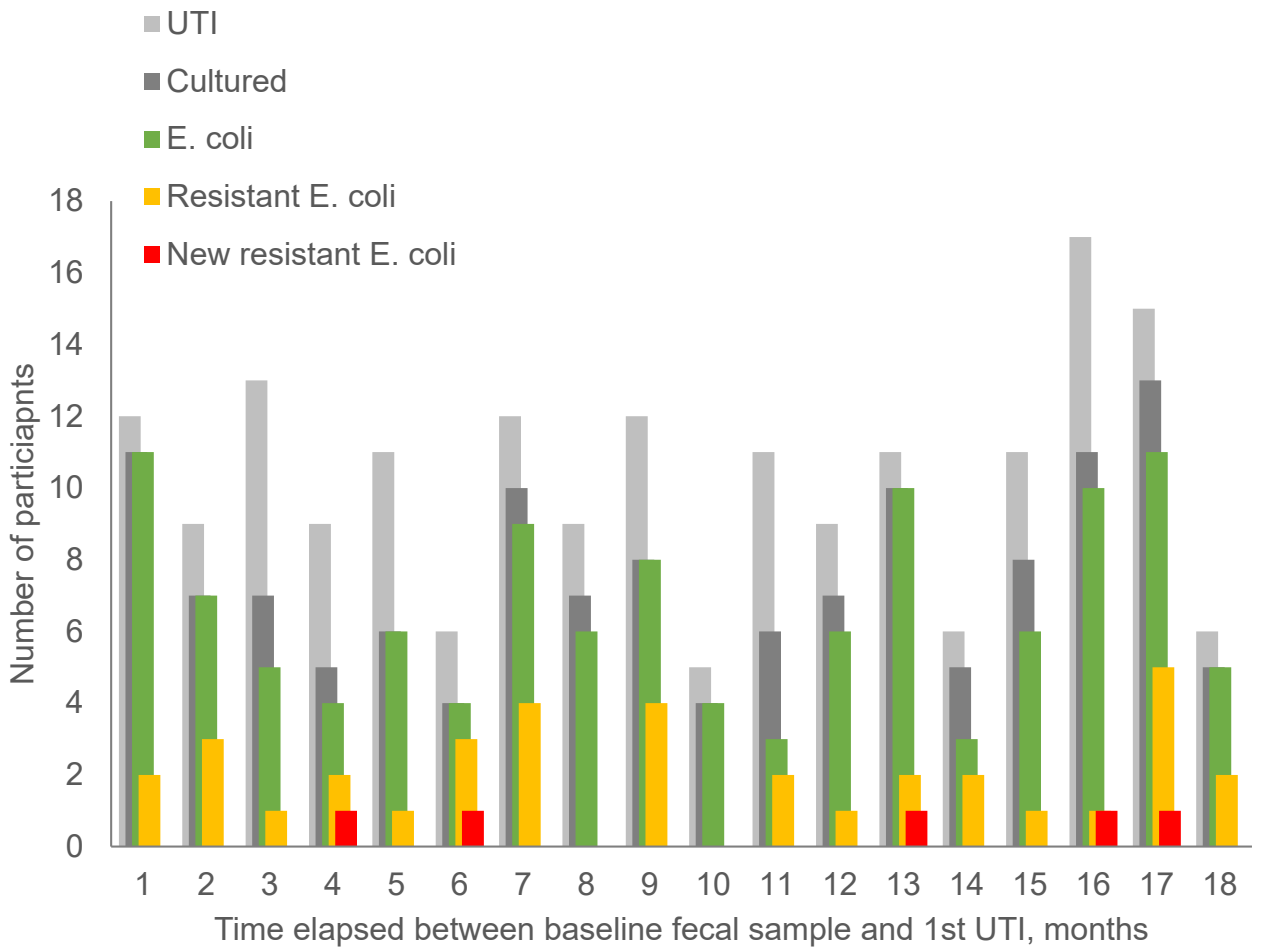

**Figure S5. UTI incidence rates and uropathogens' characteristics.** Plotted here are overlaying frequencies as follows: total number of UTIs occurring within 1-18 months from submitting fecal samples in grey; positive urine culture in dark-grey; *E. coli* in urine green; *E. coli* resistant to FQ, TS and/or 3GC in orange; *E. coli* resistant to FQ, TS and/or 3GC and not found in fecal sample in red.

**A**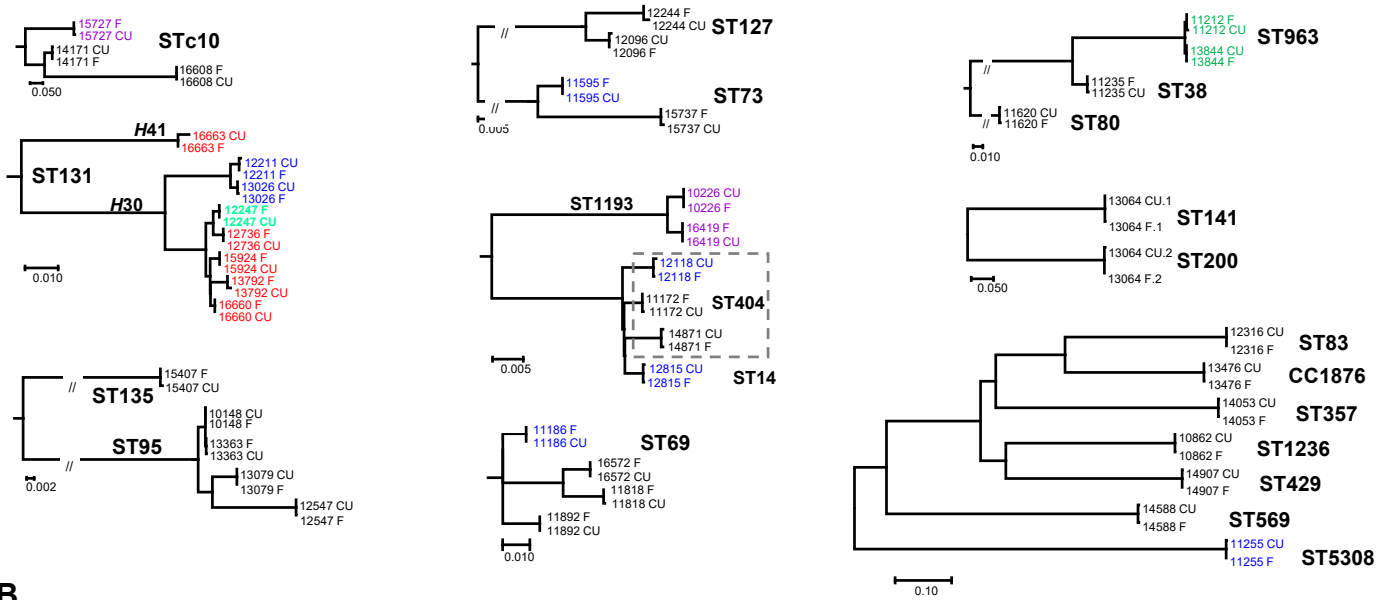**B**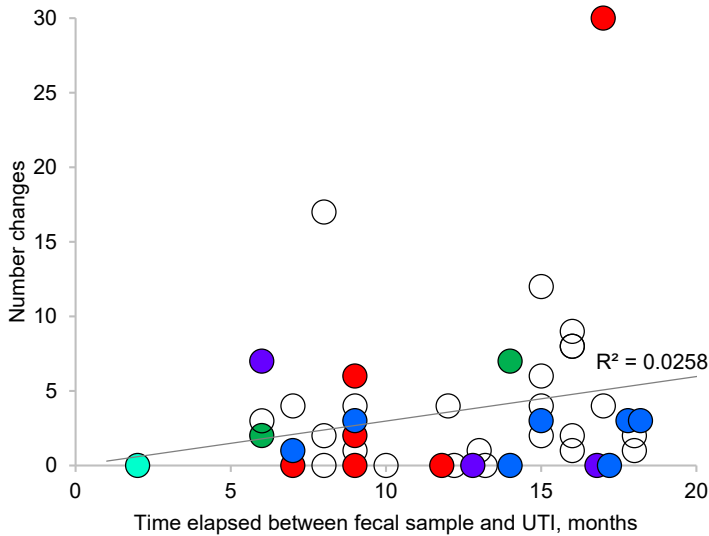

**Supplemental Figure S6. Analysis of core-genome sequences for paired fecal (F) and corresponding clinical urine (CU) isolates. (A)** Molecular phylogenetic analyses were performed using the Maximum Likelihood method implemented in MEGA7, generating SNP-based phylogenies for *E. coli* fecal-urine pairs with closely related sequence types (STs). Separate phylogenetic trees were constructed for each group of closely related pairs. Nine pairs that lacked a closely related counterpart within the dataset were placed on two trees: one for sample ID\_13064, which contained *E. coli* belonging to two distinct sequence types, and one for the remaining seven STs. **(B)** Total numbers of core-gene changes (SNPs and indels) between F and CU isolates plotted against the time interval between baseline fecal sampling and clinical urine collection. A linear trendline is shown with the  $R^2$  value indicated. Isolates resistant only to CIP are shown in red, only to TMP/SXT in blue, only to 3GC in green, to both CIP and TMP/SXT in purple, and to all three antibiotics in bold turquoise.

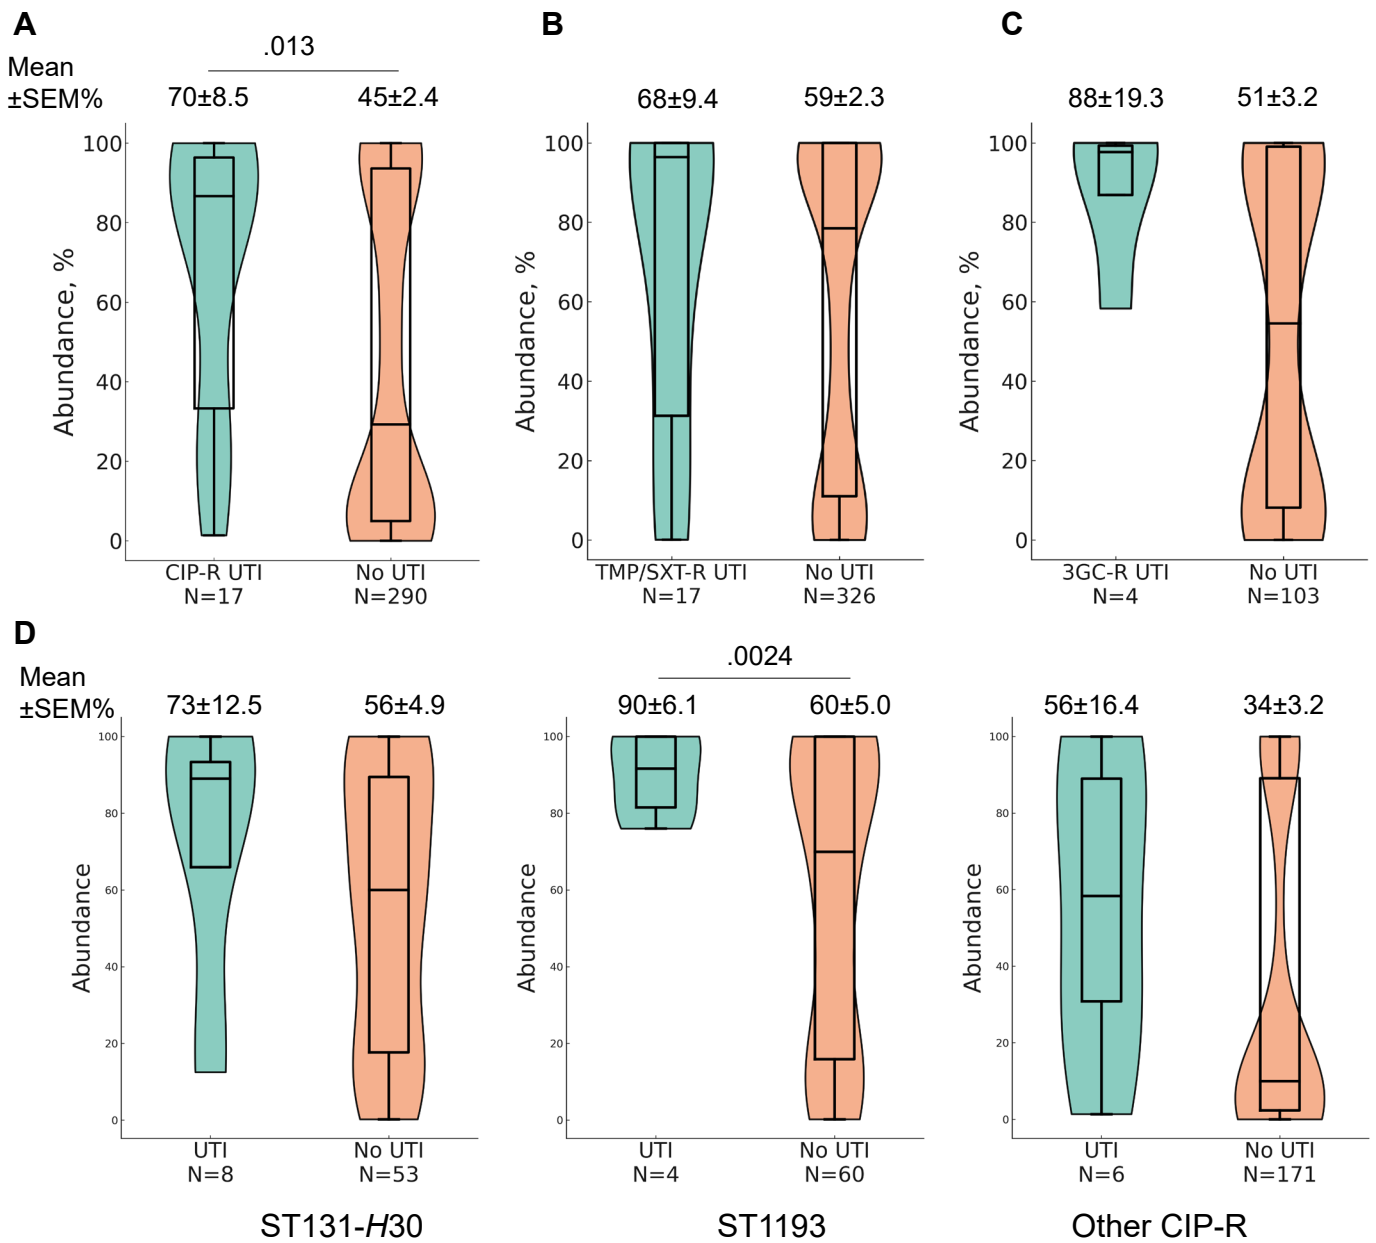

**Supplemental Figure S7. Violin/box plot of abundances of different resistant *E. coli* vs. total *E. coli* in fecal samples of women with and without UTI. A) Among CIP-R *E. coli* carriers; B) Among TMP/SXT-R *E. coli* carriers; C) Among 3GC-R *E. coli* carriers; D) Among carriers of different clonal groups of CIP-R *E. coli*. Sample size is shown in parenthesis. Mean abundance (Mean  $\pm$  SEM%) is displayed above the plots. *P* values for statistically significant differences are indicated above the solid lines.**



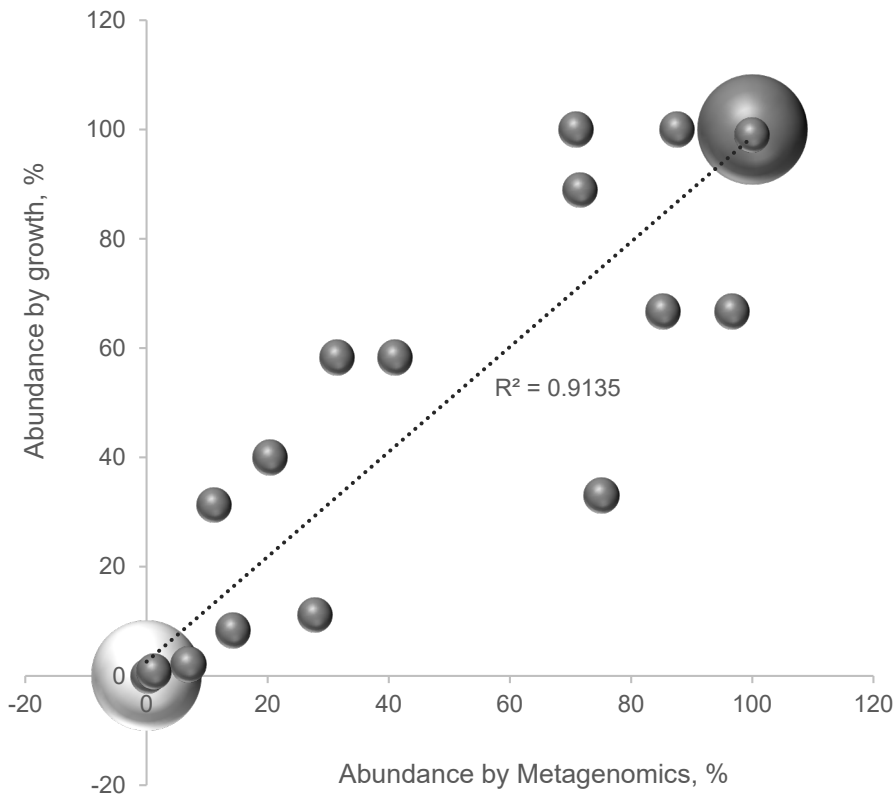

**Figure S8. Correlation between prevalence of clones identified by growth analysis and Metagenomics analysis.** For 36 fecal samples shotgun metagenomics was performed for pooled 1,000-10,000 single colonies grown on McConkey agar. UTI *E. coli* clone's abundance among all fecal *E. coli* within each sample was determined both from metagenomic analysis and culture data, and compared on the graph, with the bubble size reflecting number of samples. Light grey bubble indicates cases where urinary *E. coli* was not found either by metagenomic analysis or by culture. Trendline and  $R^2$  value indicated the linear fit.

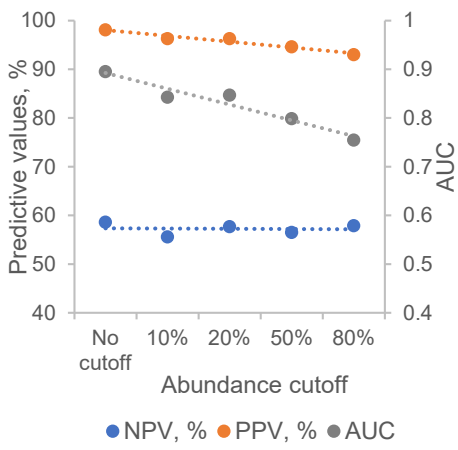

**TMP/SXT-R**

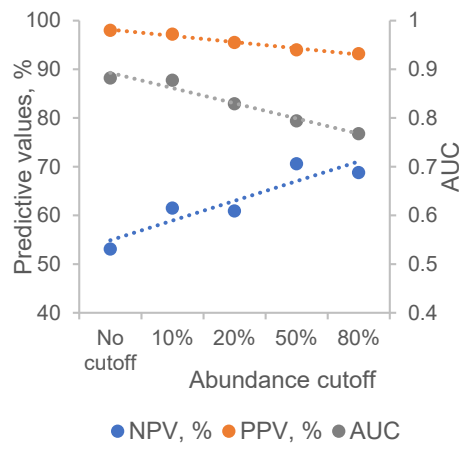

**CIP-R**

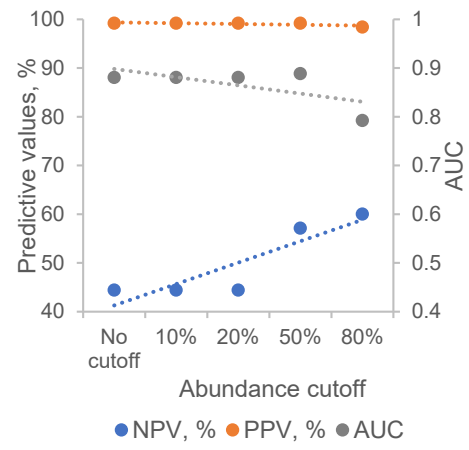

**3GC-R**

**Supplemental Figure S9. Effect of abundance of resistant *E. coli* within fecal sample on prediction of uropathogen's antibiotic susceptibility.** PPV (prediction of susceptibility to antibiotic), NPV (prediction of resistance to antibiotic) and AUC (overall test performance) was calculated for different cutoff of resistant *E. coli* prevalence within fecal samples (aka, abundance).

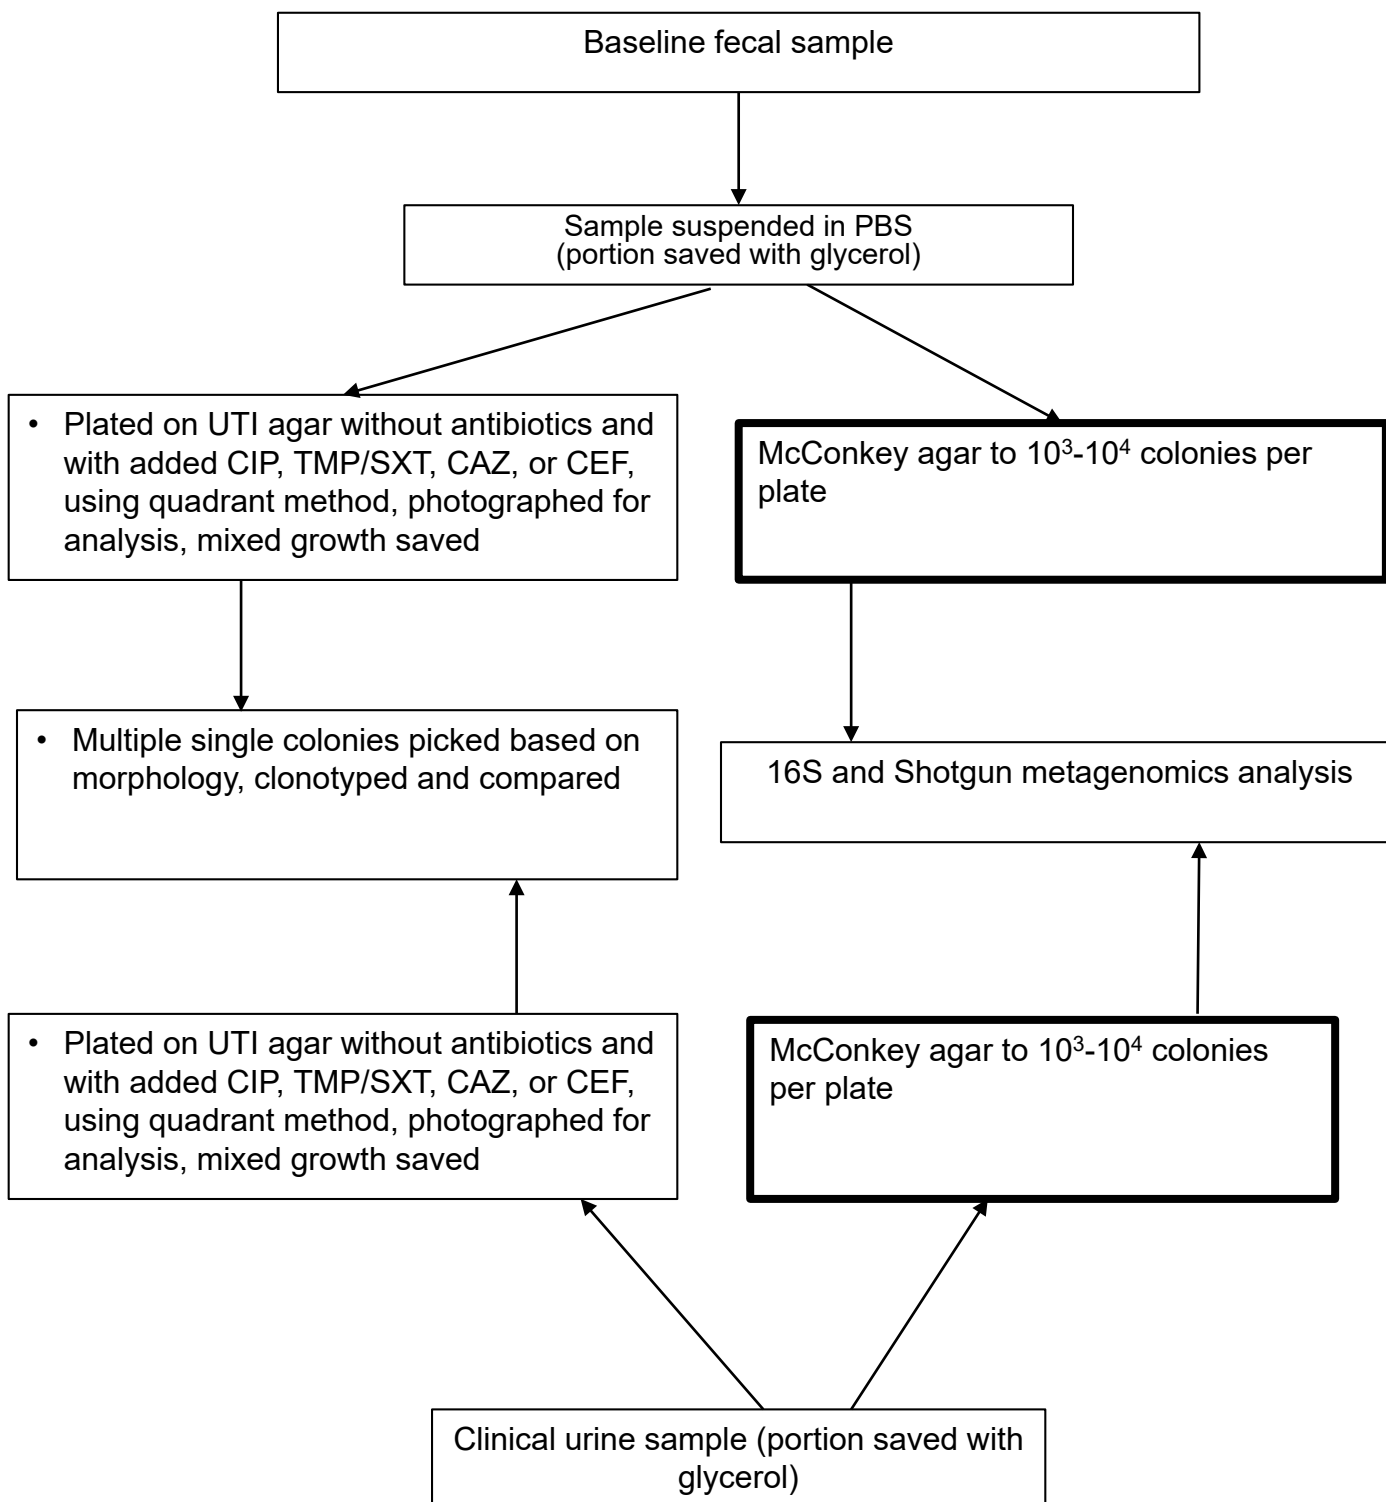

**Supplemental Figure S10.** Flowchart outlining the workflow for processing baseline fecal samples and subsequent clinical urine isolates, including sample collection, culturing, sequencing, and downstream genomic analyses.

# 1 Supplemental Methods

## 2 Fecal sample collection

3 Fecal samples were collected via self-collection kits. The kits mailed to potential  
4 enrollees included a culture swab and tube, biohazard bag with absorbent material  
5 inside, a piece of bubble padding, a shipping box, invitation letter, consent information  
6 sheet and detailed instructions. Instructions specified the importance of labeling the  
7 collected sample with the date of collection and mailing the sample as soon as possible.  
8 Samples were received by KPRWHI survey team and stored at 4°C until picked up by  
9 UW processing team. For all samples the time lapse between collection date and  
10 processing date was on average 5.3±2.0 days, with 90% samples processed within a  
11 week from recorded sample collection.

## 12 Sample processing

13 The flow of sample processing steps is illustrated in Supplemental Figure S10. Fecal  
14 samples were self-collected using the FecalSwab™ Sample Collection and  
15 Preservation System for Enteric Bacteria by Copan Diagnostic Inc. (Carlsbad, CA,  
16 USA). At the processing start samples were visually assessed for the quality of fecal  
17 matter before being plated on four types of agar as described in our previous  
18 manuscript<sup>1</sup>. Pre-poured HardyCHROM™ UTI agar plates (Hardy Diagnostic, USA)  
19 were used for non-antibiotic plating of *E. coli*. The proprietary composition of these  
20 plates allows for the differential detection of uropathogenic microorganisms. For plating  
21 on ciprofloxacin, plates containing ciprofloxacin at 0.5, 2 or 10 mg/L were prepared  
22 using HiChrome™ UTI Agar (HiMedia Laboratories Pvt, Ltd., India). Sample was plated  
23 using standard quadrant plating technique<sup>2</sup>. The rest of the sample was split into two  
24 tubes (with and without 10% glycerol) and stored at -80°C. The plates were incubated at  
25 37°C for 16-20 hours, inspected visually, and the growth characteristics were  
26 documented including the quantitative growth level of potential *E. coli*, Gram-negative  
27 and total bacteria. Single colonies with *E. coli*-like morphology were isolated from all  
28 growth-positive CIP plates and a random selection of UTI plates for further analysis. The

29 mixed cultures were then preserved in 10% glycerol-containing freezer medium and  
30 stored at -80°C.

### 31 Quantification of relative *E. coli* and CIP-resistant *E. coli* abundance in fecal 32 samples

33 As described above, the semi-quantitative quadrant streaking was performed on  
34 chromogenic UTI agar to estimate the relative abundance of *E. coli* (on plain agar  
35 plates) and CIP-resistant *E. coli* (on ciprofloxacin-supplemented plates) in fecal  
36 samples. Colony counts were taken from the final growth quadrant, where individual  
37 colonies could be clearly distinguished. Morphological characteristics provided by the  
38 manufacturer were used to differentiate *E. coli* from other Gram-negative and Gram-  
39 positive bacteria (see **Supplemental Figure S3A** for example). This approach allowed  
40 calculation of the proportion of *E. coli* colonies relative to the total Gram-negative or  
41 overall bacterial growth. The abundance of CIP-resistant *E. coli* relative to total *E. coli*  
42 was determined by comparing colony counts on ciprofloxacin-containing versus plain  
43 agar.

### 44 Identification of TMP/STX-R and 3GC-R *E. coli* in fecal samples

45 An aliquot of every fecal sample stored in glycerol was resuspended in 100 µL of  
46 Mueller-Hinton (MH) broth, incubated at 37°C for 2 hours, plated on UTI agar  
47 supplemented with ciprofloxacin (CIP, 0.5 mg/L), trimethoprim/sulfamethoxazole  
48 (TMP/STX, 4/76 mg/L), ceftazidime (CAZ, 8 mg/L), cefotaxime (CTX, 2 mg/L), and  
49 without antibiotics. After overnight incubation plates were processed same way as  
50 described above. Growth on UTI-CIP plate served as data reproducibility control. All  
51 potentially resistant *E. coli* colonies were subcultured on MH-agar supplemented with  
52 respective antibiotic to confirm their non-susceptibility status.

### 53 Clinical urine sample collection and processing

54 If a study participant submitted a urine sample to KPWA clinical laboratory, a routine  
55 urinalysis test was performed, followed by culture and sensitivity testing if required.  
56 Starting February 2022, the UW laboratory was provided an aliquot of the urine sample,

57 which was processed using the same protocol as fecal sample described above, with  
58 initial plating on plain and CIP-UTI plates. Potential *E. coli* were saved as at least 4-5  
59 individual colonies and used for antibiotic susceptibility testing and identification of *E.*  
60 *coli* clonality (see below). The time lapse between the beginning of the study (May  
61 2021) and the start of availability of clinical urine samples to the UW lab accounts for  
62 the lack of clonal information for some *E. coli*-caused UTIs.

### 63 Identification of *E. coli* clonality

64 *E. coli* clonality was determined by CH typing based on *fumC/fimH* sequencing<sup>3</sup>,  
65 presence of QRDR mutations was determined by sequencing of *gyrA* and *parC*<sup>4</sup>. All  
66 reactions were carried out by 2-step colony PCR. Briefly, a single *E. coli* colony was  
67 resuspended in 50 µL of sterile water and heated at 98°C for 10 min. Primary PCR  
68 reactions were set up in a 15 µL volume using DreamTaq Mastermix (ThermoFisher,  
69 USA), supplemented with 0.5 µM forward and reverse primers, and 1.5 µL of the boiled  
70 colony template. Primary PCR was run for 30 cycles under the manufacturer's  
71 recommended conditions. Subsequently, 1 µL of the PCR1 product was used for an  
72 additional PCR reaction, using nested forward and reverse primers supplemented with  
73 T7 and T7-Term tails, respectively. The nested PCR was run for 15 cycles under the  
74 same conditions, aiming to obtain a highly specific single band with T7-tailed primers  
75 suitable for downstream sequencing. The primer sequences can be found in  
76 **Supplemental Table S4.**

### 77 Testing antibiotic resistance of *E. coli* isolates

78 Resistance of fecal *E. coli* isolates to antibiotics of interest was performed using agar  
79 dilution method as described in CLSI manual <sup>5</sup>. Resistance of urinary *E. coli* isolates to  
80 a panel of 12 antibiotics was tested using Kirby-Bauer disk diffusion method as  
81 described in CLSI manual <sup>5</sup>.

### 82 Metagenomic analysis

83 *Sequencing.*

84 A subset of 36 pairs of fecal and clinical urine samples was analyzed to assess the  
85 relative abundance of *E. coli* among enterobacteria, as well as the presence and  
86 prevalence of specific *E. coli* clones. Different dilutions of samples were plated on  
87 MacConkey agar to obtain  $10^3$ - $10^4$  colonies per plate. Total growth was pooled and DNA  
88 was extracted from pooled colonies. DNA was used for shotgun metagenomic  
89 sequencing on an Illumina MiSeq platform using the MiSeq 600 cycle v3 kit, following  
90 the manufacturer's guidelines. Genomic DNA libraries were prepared with the Nextera  
91 XT Library Prep Kit (Illumina, CA). The raw reads were analyzed for species  
92 composition and urinary *E. coli* clone abundance as follows.

### 93 *Determining species composition in sample.*

94 Shotgun metagenomic reads were analyzed using the PATRIC Taxonomic Profiling Tool  
95 (<https://patricbrc.org/>). Raw reads were quality-checked with FastQC and trimmed using  
96 Trim Galore (Phred < 20). High-quality reads were processed through PATRIC, which  
97 employs Kraken2 for taxonomic classification and Bracken for abundance estimation.  
98 Taxonomic profiles, including relative species abundances, were generated and  
99 exported for downstream analysis.

### 100 *Detection and quantification of urinary E. coli clone in samples.*

101 The presence and abundance of the urinary *E. coli* clone in fecal samples were  
102 determined through comparative genomics and targeted read alignment. First, the  
103 sequenced urinary clone was compared to genomes of the same sequence type (ST)  
104 and different STs using both in-house sequenced isolates and publicly available  
105 genomes from Enterobase (<https://enterobase.warwick.ac.uk/>). This analysis identified  
106 ST-specific alleles and isolate-specific SNPs unique to the clone of interest.

107 Raw sequencing reads were aligned to the identified alleles using BWA-MEM with  
108 default parameters. The resulting SAM file was converted to a sorted and indexed BAM  
109 file using SAMtools for efficient variant calling and read depth analysis. Variant calling  
110 was performed using BCFtools mpileup, with a maximum depth (-d 250), a minimum  
111 mapping quality (-q 60), and a minimum base quality (-Q 30), ensuring high-confidence  
112 variant detection. The bcftools call function was used in multiallelic (-m) and variant-only

113 (-v) mode, with a ploidy setting of 1 (haploid), to generate a compressed VCF file  
114 containing identified variants. The VCF file was then indexed and queried to extract  
115 depth of coverage (%DP) and allele frequencies (%AD) for each position of interest.

116 The output was manually examined for the presence of alleles unique to the strain of  
117 interest. The relative abundance of the strain was calculated as the proportion of  
118 sequencing reads supporting the unique SNPs, using the following formula:

$$119 \text{ Abundance (\%)} = \frac{\sum \text{RefReads (unique SNPs)}}{\sum (\text{RefReads (unique SNPs)} + \text{AltReads (unique SNPs)})} \times 100$$

121 If no unique SNPs were detected, the alignment process was repeated for other  
122 identified alleles to confirm the absence of the strain in the sample.

## 123 REFERENCES

- 124 1. Tchesnokova, V., *et al.* Increase in the community circulation of ciprofloxacin-  
125 resistant *Escherichia coli* despite reduction in antibiotic prescriptions. *Commun*  
126 *Med (Lond)* **3**, 110 (2023).
- 127 2. Cappuccino, J.G.S., Natalie. *Microbiology: A Laboratory Manual*, (Pearson, New  
128 York, NY, 2021).
- 129 3. Weissman, S.J., *et al.* High-resolution two-locus clonal typing of extraintestinal  
130 pathogenic *Escherichia coli*. *Appl Environ Microbiol* **78**, 1353-1360 (2012).
- 131 4. Johnson, J.R., *et al.* Abrupt emergence of a single dominant multidrug-resistant  
132 strain of *Escherichia coli*. *J Infect Dis* **207**, 919-928 (2013).
- 133 5. CLSI. Performance standards for antimicrobial susceptibility testing; twentieth  
134 information supplement. Vol. 30 (2010).

135



## Supplemental Tables

**Table S1.** Clonotype distribution of multidrug-resistant CIP-R *E. coli* isolated from fecal samples. ST, sequence type, CC, clonal complex, H, *fimH* allele, Q, number of QRDR mutations in *gyrA* and/or *parC* known to confer CIP-resistance; for ST69-H27(2Q) and ST38-H5(1Q) and ST38-H65(3Q) *gyrA* and *parC* allele numbers are listed after comma to indicate different CIP-R clones.

| CIP-R <i>E. coli</i> Clone | No. CIPR-SC<br>(%Total) | No. CIPR MDR<br>SC (%Total) |
|----------------------------|-------------------------|-----------------------------|
| H30                        | 70 (20.3)               | 27 (18.4)                   |
| ST1193                     | 68 (19.7)               | 29 (19.7)                   |
| ST131-H41(1Q)              | 15 (4.3)                | 8 (5.4)                     |
| ST69-H27, 14-76(2Q)        | 15 (4.3)                | 4 (2.7)                     |
| ST69-H27, 14-13(2Q)        | 12 (3.5)                | 6 (4.1)                     |
| ST648-H0(3Q)               | 9 (2.6)                 | 5 (3.4)                     |
| ST69-H27(0Q)               | 8 (2.3)                 | 3 (2)                       |
| ST69-H27(1Q)               | 6 (1.7)                 | 3 (2)                       |
| ST69-H27(3Q)               | 5 (1.4)                 | 3 (2)                       |
| ST38-H5(3Q)                | 4 (1.2)                 | 3 (2)                       |
| ST10-H27(1Q)               | 4 (1.2)                 | 2 (1.4)                     |
| ST354-H58(4Q)              | 3 (0.9)                 | 3 (2)                       |
| ST636-H0(1Q)               | 3 (0.9)                 | 3 (2)                       |
| ST394-H30(1Q)              | 3 (0.9)                 | 2 (1.4)                     |
| ST95-H41(1Q)               | 3 (0.9)                 | 1 (0.7)                     |
| ST38-H65, 11-14(3Q)        | 3 (0.9)                 | 0 (0)                       |
| ST405-H27(3Q)              | 2 (0.6)                 | 2 (1.4)                     |
| ST44(CC10)-H54(3Q)         | 2 (0.6)                 | 2 (1.4)                     |
| ST6151(CC21)-H0(3Q)        | 2 (0.6)                 | 2 (1.4)                     |
| ST773(CC10)-H0(3Q)         | 2 (0.6)                 | 2 (1.4)                     |
| ST10-H54(4Q)               | 2 (0.6)                 | 1 (0.7)                     |
| ST38-H65, 11-11(3Q)        | 2 (0.6)                 | 1 (0.7)                     |
| ST457-H145(3Q)             | 2 (0.6)                 | 1 (0.7)                     |
| ST648-H30(3Q)              | 2 (0.6)                 | 1 (0.7)                     |
| ST6754(CC101)-H0(1Q)       | 2 (0.6)                 | 1 (0.7)                     |
| ST69(3Q)                   | 2 (0.6)                 | 1 (0.7)                     |
| CC10-H27(3Q)               | 2 (0.6)                 | 0 (0)                       |
| ST10-H215(3Q)              | 2 (0.6)                 | 0 (0)                       |
| ST1177(CC38)-H65(2Q)       | 2 (0.6)                 | 0 (0)                       |
| ST224(CC58)-H61(3Q)        | 2 (0.6)                 | 0 (0)                       |

|                         |         |         |
|-------------------------|---------|---------|
| ST38-H5, 14-36(1Q)      | 2 (0.6) | 0 (0)   |
| ST48(CC10)-H34(0Q)      | 2 (0.6) | 0 (0)   |
| ST93(CC10)-H30(3Q)      | 2 (0.6) | 0 (0)   |
| CC10-H54(3Q)            | 1 (0.3) | 1 (0.7) |
| CC349-H54(1Q)           | 1 (0.3) | 1 (0.7) |
| CH12-342(0Q)            | 1 (0.3) | 1 (0.7) |
| ST10-H27(0Q)            | 1 (0.3) | 1 (0.7) |
| ST10-H28(1Q)            | 1 (0.3) | 1 (0.7) |
| ST117-H97(3Q)           | 1 (0.3) | 1 (0.7) |
| ST127-H2(1Q)            | 1 (0.3) | 1 (0.7) |
| ST12-H7(0Q)             | 1 (0.3) | 1 (0.7) |
| ST131-H41(4Q)           | 1 (0.3) | 1 (0.7) |
| ST1380(CC394)-H1057(0Q) | 1 (0.3) | 1 (0.7) |
| ST14-H27(1Q)            | 1 (0.3) | 1 (0.7) |
| ST1844(CC111)-H38(0Q)   | 1 (0.3) | 1 (0.7) |
| ST2006(CC58)-H61(3Q)    | 1 (0.3) | 1 (0.7) |
| ST2197(CC10)-H23(3Q)    | 1 (0.3) | 1 (0.7) |
| ST224(CC58)-H54(3Q)     | 1 (0.3) | 1 (0.7) |
| ST362-H96(0Q)           | 1 (0.3) | 1 (0.7) |
| ST38-H5, 294-36(1Q)     | 1 (0.3) | 1 (0.7) |
| ST38-H54(1Q)            | 1 (0.3) | 1 (0.7) |
| ST38-H65, 11-13(3Q)     | 1 (0.3) | 1 (0.7) |
| ST393(CC69)-H54(3Q)     | 1 (0.3) | 1 (0.7) |
| ST457-H145(0Q)          | 1 (0.3) | 1 (0.7) |
| ST58-H1325(1Q)          | 1 (0.3) | 1 (0.7) |
| ST617(CC10)-H29(3Q)     | 1 (0.3) | 1 (0.7) |
| ST62-H44(0Q)            | 1 (0.3) | 1 (0.7) |
| ST636-H27(1Q)           | 1 (0.3) | 1 (0.7) |
| ST69-H25(1Q)            | 1 (0.3) | 1 (0.7) |
| ST69-H27, 14-2(2Q)      | 1 (0.3) | 1 (0.7) |
| ST73-H10(1Q)            | 1 (0.3) | 1 (0.7) |
| ST95-H41(0Q)            | 1 (0.3) | 1 (0.7) |
| ST95-H468(1Q)           | 1 (0.3) | 1 (0.7) |
| ST95-H99(1Q)            | 1 (0.3) | 1 (0.7) |
| CC10-H34(3Q)            | 1 (0.3) | 0 (0)   |
| CC2797-H1637(0Q)        | 1 (0.3) | 0 (0)   |
| CC349-H54(3Q)           | 1 (0.3) | 0 (0)   |
| CC58-H121(1Q)           | 1 (0.3) | 0 (0)   |
| CH12-1580(1Q)           | 1 (0.3) | 0 (0)   |
| CH14-27(0Q)             | 1 (0.3) | 0 (0)   |
| ST10-H0(0Q)             | 1 (0.3) | 0 (0)   |
| ST10-H28(0Q)            | 1 (0.3) | 0 (0)   |
| ST10-H30                | 1 (0.3) | 0 (0)   |

|                        |         |       |
|------------------------|---------|-------|
| ST10-H54(0Q)           | 1 (0.3) | 0 (0) |
| ST10-H54(3Q)           | 1 (0.3) | 0 (0) |
| ST1163                 | 1 (0.3) | 0 (0) |
| ST131-H41(3Q)          | 1 (0.3) | 0 (0) |
| ST140(CC95)-H15(1Q)    | 1 (0.3) | 0 (0) |
| ST1431(CC58)-H32(3Q)   | 1 (0.3) | 0 (0) |
| ST155(CC58)-H0(0Q)     | 1 (0.3) | 0 (0) |
| ST1723-H38(3Q)         | 1 (0.3) | 0 (0) |
| ST206(CC77)-H0(0Q)     | 1 (0.3) | 0 (0) |
| ST206(CC77)-H23(3Q)    | 1 (0.3) | 0 (0) |
| ST216-H69(1Q)          | 1 (0.3) | 0 (0) |
| ST2772(CC58)-H26(0Q)   | 1 (0.3) | 0 (0) |
| ST2973-H31(2Q)         | 1 (0.3) | 0 (0) |
| ST349-H54(0Q)          | 1 (0.3) | 0 (0) |
| ST372-H1639(1Q)        | 1 (0.3) | 0 (0) |
| ST3863(CC21)-H1632(0Q) | 1 (0.3) | 0 (0) |
| ST38-H0(3Q)            | 1 (0.3) | 0 (0) |
| ST38-H30(3Q)           | 1 (0.3) | 0 (0) |
| ST38-H5(0Q)            | 1 (0.3) | 0 (0) |
| ST405-H29(3Q)          | 1 (0.3) | 0 (0) |
| ST4267(CC58)-H54(0Q)   | 1 (0.3) | 0 (0) |
| ST4305(CC10)-H0(2Q)    | 1 (0.3) | 0 (0) |
| ST450-H34(3Q)          | 1 (0.3) | 0 (0) |
| ST452-H0(0Q)           | 1 (0.3) | 0 (0) |
| ST5150(CC38)-H65(2Q)   | 1 (0.3) | 0 (0) |
| ST569-H5(1Q)           | 1 (0.3) | 0 (0) |
| ST5869(CC3945)-H31(3Q) | 1 (0.3) | 0 (0) |
| ST58-H30(0Q)           | 1 (0.3) | 0 (0) |
| ST58-H32(0Q)           | 1 (0.3) | 0 (0) |
| ST59-H34(0Q)           | 1 (0.3) | 0 (0) |
| ST68-H382(1Q)          | 1 (0.3) | 0 (0) |
| ST69(0Q)               | 1 (0.3) | 0 (0) |
| ST744(CC10)-H54(3Q)    | 1 (0.3) | 0 (0) |
| ST744-H54(3Q)          | 1 (0.3) | 0 (0) |
| ST80-H1(0Q)            | 1 (0.3) | 0 (0) |
| ST8492(CC58)-H38(3Q)   | 1 (0.3) | 0 (0) |
| ST906(CC58)-H32(0Q)    | 1 (0.3) | 0 (0) |
| ST93(CC10)-H0(0Q)      | 1 (0.3) | 0 (0) |
| ST969(CC625)-H115(1Q)  | 1 (0.3) | 0 (0) |
| not determined         | 1 (0.3) | 0 (0) |
| Total CIP-R SC         | 345     | 147   |

**Table S2.** UTI *E. coli* resistant to antibiotics.

| <b>ID</b> | <b>ET <sup>a</sup></b> | <b>UTI <i>E. coli</i> clone <sup>b</sup></b> | <b>Resistance <sup>c</sup></b> | <b>CU=F <sup>d</sup></b> |
|-----------|------------------------|----------------------------------------------|--------------------------------|--------------------------|
| 10094     | 7                      | sample unavailable                           | TS                             | YES                      |
| 10152     | 17                     | ST131-H30                                    | CIP                            | <b>no</b>                |
| 10226     | 13                     | ST1193                                       | CIP TS                         | YES                      |
| 10273     | 2                      | sample unavailable                           | TS                             | YES                      |
| 10571     | 5                      | sample unavailable                           | TS 3GC                         | YES                      |
| 10860     | 6                      | sample unavailable                           | TS                             | <b>no</b>                |
| 10891     | 2                      | sample unavailable                           | CIP                            | YES                      |
| 11186     | 14                     | ST69-H27                                     | TS                             | YES                      |
| 11212     | 14                     | ST963(CC38)-H26                              | 3GC                            | YES                      |
| 11255     | 9                      | ST5308(CC674)-H233                           | TS                             | YES                      |
| 11403     | 4                      | sample unavailable                           | 3GC                            | <b>no</b>                |
| 11595     | 17                     | ST73-H10                                     | TS                             | YES                      |
| 11921     | 7                      | sample unavailable                           | TS                             | YES                      |
| 12118     | 18                     | ST404(CC14)-H27                              | TS                             | YES                      |
| 12211     | 15                     | ST131-H30 (0 QRDR)                           | TS                             | YES                      |
| 12247     | 2                      | ST131-H30                                    | CIP TS 3GC                     | YES                      |
| 12450     | 1                      | sample unavailable                           | CIP                            | YES                      |
| 12736     | 9                      | ST131-H30                                    | CIP                            | YES                      |
| 12815     | 18                     | ST404(CC14)-H27                              | TS                             | YES                      |
| 13026     | 7                      | ST131-H30                                    | TS                             | YES                      |
| 13168     | 11                     | ST69-H27(2Q)                                 | CIP TS                         | YES                      |
| 13561     | 16                     | ST131-H30                                    | CIP                            | <b>no</b>                |
| 13792     | 9                      | ST131-H30                                    | CIP                            | YES                      |
| 13844     | 6                      | ST963(CC38)-H26                              | 3GC                            | YES                      |
| 14315     | 1                      | sample unavailable                           | CIP                            | YES                      |
| 14440     | 4                      | sample unavailable                           | CIP                            | YES                      |
| 14509     | 11                     | ST131-H30                                    | CIP                            | YES                      |
| 14737     | 3                      | sample unavailable                           | CIP                            | YES                      |
| 15034     | 17                     | ST131-H41                                    | TS                             | YES                      |
| 15727     | 6                      | CC10-H54                                     | CIP TS                         | YES                      |
| 15823     | 13                     | ST69-H27                                     | TS                             | <b>no</b>                |
| 15924     | 7                      | ST131-H30                                    | CIP                            | YES                      |
| 16419     | 17                     | ST1193                                       | CIP TS                         | YES                      |
| 16572     | 9                      | ST69-H27(2Q)                                 | CIP                            | YES                      |
| 16660     | 12                     | ST131-H30                                    | CIP                            | YES                      |
| 16663     | 17                     | ST131-H41                                    | CIP                            | YES                      |

<sup>a</sup> ET, time elapsed between UTI and fecal sample, in months.

<sup>b</sup> No sample – sample not available in UW laboratory, clonal typing not performed.

<sup>c</sup> Resistance of uropathogenic *E. coli* was determined in KPWA clinical laboratory and confirmed in UW laboratory if sample was available. CIP, ciprofloxacin, TS, trimethoprim/sulfamethoxazole, 3GC, 3rd generation cephalosporins (ceftazidime and/or ceftriaxone)

<sup>d</sup> CU=F, clinical uropathogenic *E. coli* clone was identified among fecal *E. coli* from the same participant

**Table S3.** Non-*E. coli* UTI uropathogens.

| <b>ID</b> | <b>ET <sup>a</sup></b> | <b>Urinary pathogen <sup>b</sup></b>      | <b>Resistance <sup>b</sup></b> | <b>Fecal <i>E. coli</i> Resistance</b> |
|-----------|------------------------|-------------------------------------------|--------------------------------|----------------------------------------|
| 11653     | 3                      | <i>C. koseri</i> (sample unavailable)     | none                           | CIP                                    |
| 12140     | 3                      | <i>K. pneumoniae</i> (sample unavailable) | none                           | none                                   |
| 10700     | 4                      | <i>K. pneumoniae</i> (sample unavailable) | none                           | none                                   |
| 12218     | 7                      | <i>E. faecalis</i>                        | none                           | none                                   |
| 11544     | 8                      | <i>K. pneumoniae</i> (sample unavailable) | none                           | none                                   |
| 15712     | 11                     | <i>C. freundii</i>                        | none                           | TMP/SXT                                |
| 10430     | 11                     | <i>Klebsiella sp.</i>                     | none                           | none                                   |
| 13734     | 11                     | <i>K. pneumoniae</i>                      | none                           | none                                   |
| 15321     | 12                     | <i>P. mirabilis</i>                       | none                           | none                                   |
| 14115     | 14                     | <i>K. pneumoniae</i>                      | none                           | none                                   |
| 11764     | 14                     | <i>P. mirabilis</i>                       | none                           | none                                   |
| 12805     | 15                     | <i>K. pneumoniae</i>                      | none                           | none                                   |
| 13446     | 15                     | <i>P. mirabilis</i>                       | none                           | none                                   |
| 15189     | 16                     | <i>Klebsiella sp.</i>                     | none                           | TMP/SXT                                |
| 12041     | 17                     | <i>K. pneumoniae</i> (sample unavailable) | none                           | none                                   |
| 10944     | 17                     | <i>Salmonella sp.</i>                     | none                           | none                                   |

<sup>a</sup> ET, time elapsed between UTI and fecal sample, in months.

<sup>b</sup> Both uropathogen's species and resistance were determined in KPWA clinical laboratory and confirmed in UW laboratory if sample was available.

**Supplemental Table S4.** Primers used for CH typing, *gyrA-parC* sequencing.

| Test                          | Target              | Primer name    | Sequence                                        | Ref        |
|-------------------------------|---------------------|----------------|-------------------------------------------------|------------|
| <b>CH typing</b>              | <b>fumC: PCR1</b>   | fumC-F         | GCATCACAGGTCGCCAGCG                             | This study |
|                               |                     | fumC-R         | GTACGCAGCGAAAAAGATTC                            |            |
|                               | <b>fumC: Nested</b> | fumC-F'-T7Pro  | <u>TAATACGACTCACTATAGGGGCGCTTCAAATTTGTTCCGG</u> | This study |
|                               |                     | fumC-R'-T7Term | <u>GCTAGTTATTGCTCAGCGGGTACGCAGCGAAAAAGATTC</u>  |            |
|                               | <b>fimH: PCR1</b>   | fimH-F         | CTGTTTGCTGTACTGCTGATG                           | This study |
|                               |                     | fimH-R         | CCACAATAAACGGTAAGAGGAAT                         |            |
|                               | <b>fimH: Nested</b> | fimH-F'-T7Pro  | <u>TAATACGACTCACTATAGGGACTGCTGATGGGCTGGTC</u>   | This study |
|                               |                     | fimH-R'-T7Term | <u>GCTAGTTATTGCTCAGCGGAGGAATTGGCACTGAACC</u>    |            |
| <b>Detection of QRDR SNPs</b> | <b>gyrA: PCR1</b>   | gyrA-F         | CGACCTTGCGAGAGAAAT                              | This study |
|                               |                     | gyrA-R         | GTTCCATCAGCCCTTCAA                              |            |
|                               | <b>gyrA: Nested</b> | gyrA-F'-T7Pro  | <u>TAATACGACTCACTATAGGGCGAGAGAAATTACACCG</u>    | This study |
|                               |                     | gyrA-R'-T7Term | <u>GCTAGTTATTGCTCAGCGGAGCCCTTCAATGCT</u>        |            |
|                               | <b>parC: PCR1</b>   | parC-F         | CGATTGCCGCCTGAGCCACTT                           | This study |
|                               |                     | parC-R         | GCGAATAAGTTGAGGAATCAG                           |            |
|                               | <b>parC: Nested</b> | parC-F'-T7Pro  | <u>TAATACGACTCACTATAGGGTGAGCCACTTCACGCA</u>     | This study |
|                               |                     | parC-R'-T7Term | <u>GCTAGTTATTGCTCAGCGGGAGGAATCAGAATTAA</u>      |            |
